# Supplementary material for: NUMB dysfunction defines a novel mechanism underlying hyperuricemia and gout
Source: PubMed Central journal article supplement (PMC11494200; doi:10.1038/s41421-024-00708-6), 2024-10-22

Raw data for Figure 2b-c

Input  
IB:NUMB

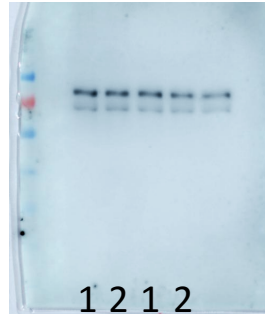

IP:ABCG2-FLAG  
IB:NUMB

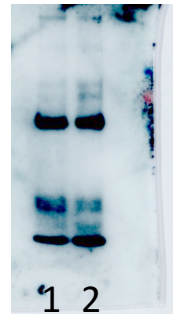

Input  
IB:ABCG2-FLAG

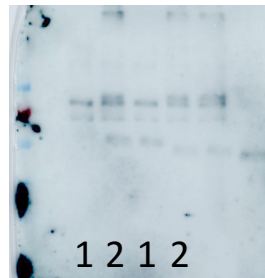

IP:ABCG2-FLAG  
IB:ABCG2-FLAG

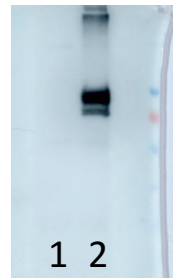

Input  
IB:β-ACTIN

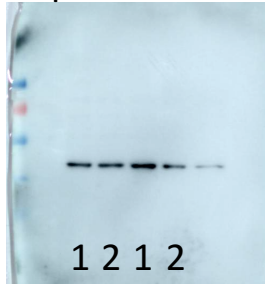

IP with FLAG antibody in HEK293 cells transfected with empty vector (negative control 1) and those transfected with ABCG2-FLAG plasmid (2)

Input  
IB:ABCG2-GFP

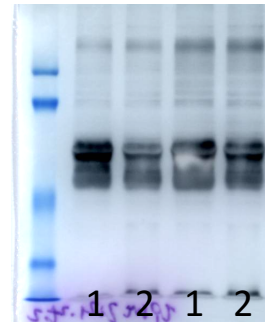

IP:NUMB-FLAG  
IB:ABCG2-GFP

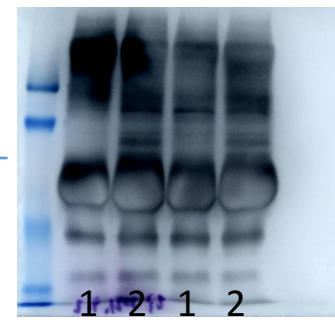

Input  
IB:NUMB-FLAG

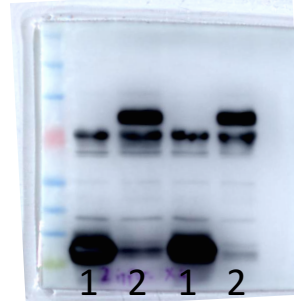

IP:NUMB-FLAG  
IB:NUMB-FLAG

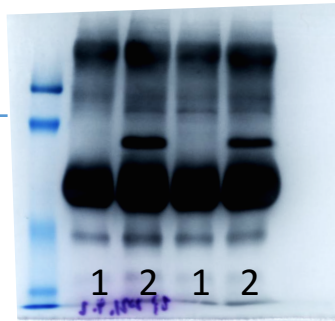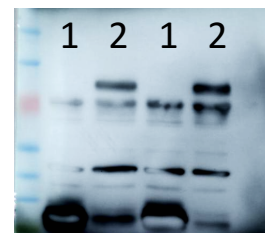

Input  
IB:β-ACTIN

IP with FLAG antibody in HEK293 cells co-transfected with empty vector and ABCG2-GFP plasmid (negative control 1) and those co-transfected with NUMB-FLAG and ABCG2-GFP plasmids (2)

Raw data for Figure 3e

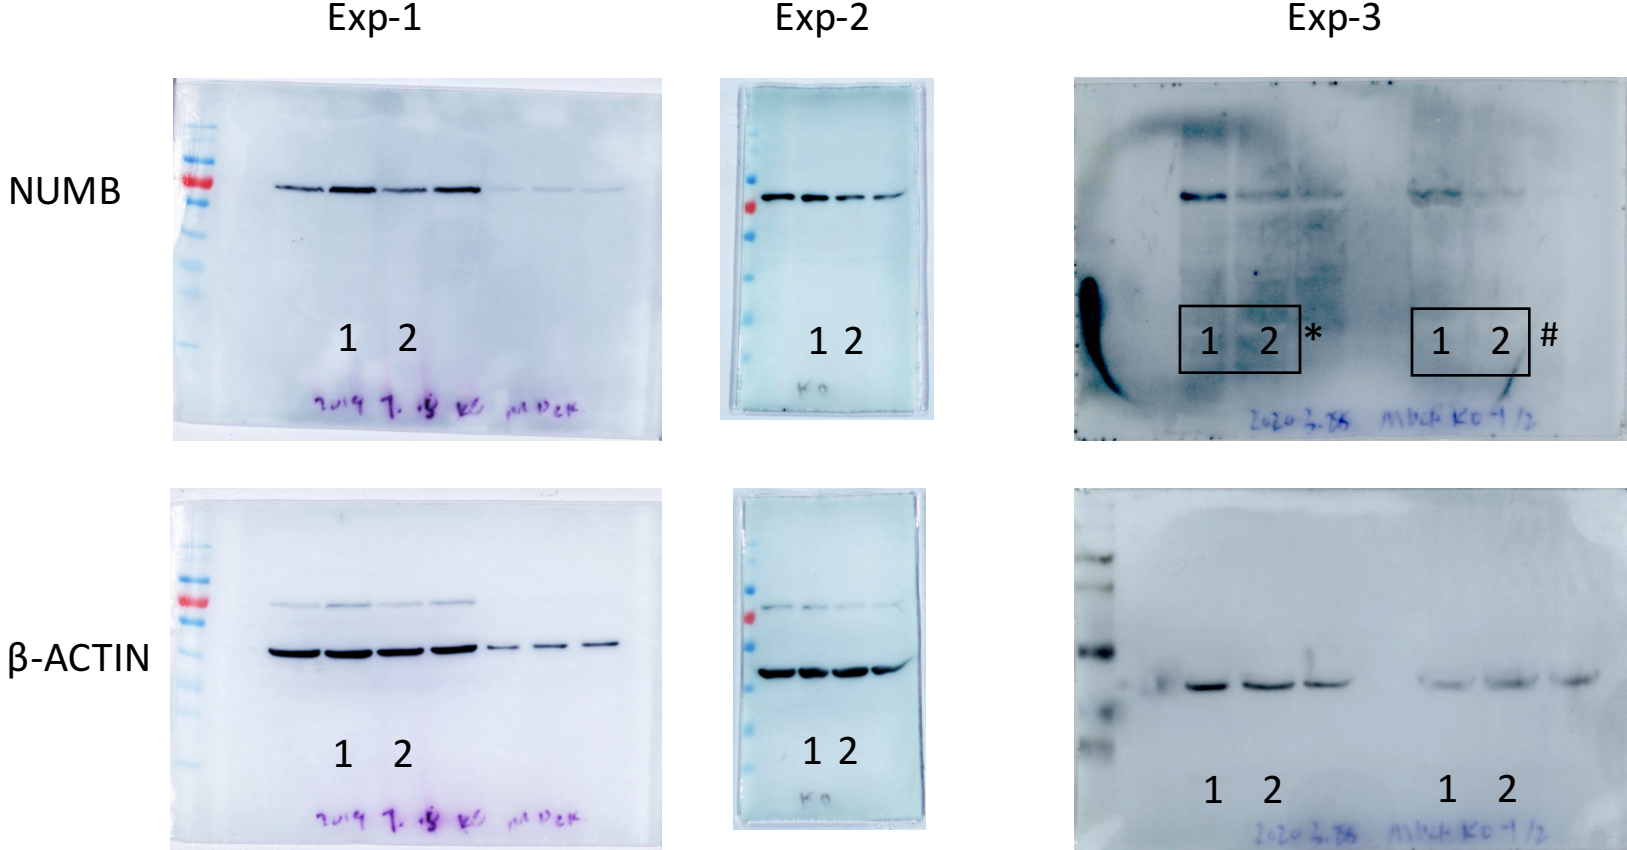

1: Vector 2: KO \* and # indicate distinct samples

Raw data for Figure 4a

Exp-1

Exp-2

Exp-3

NUMB-FLAG

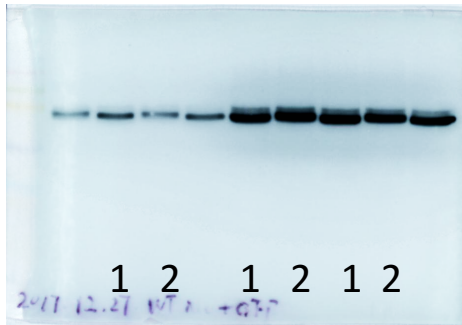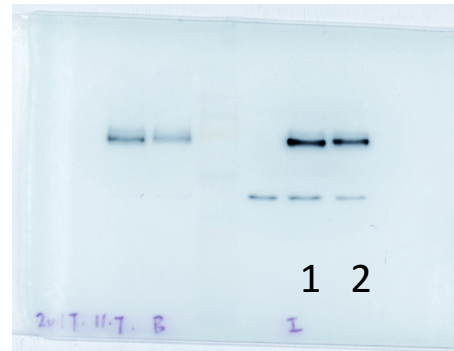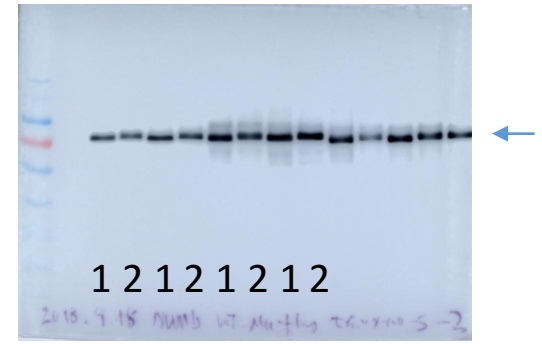

GFP

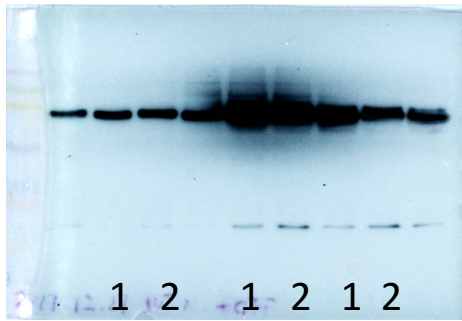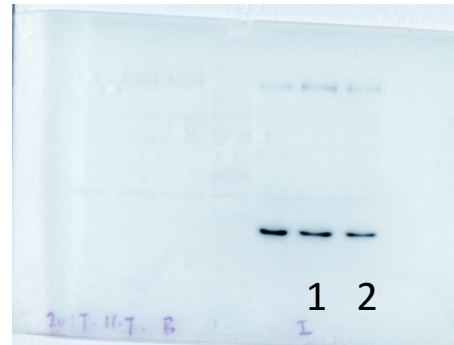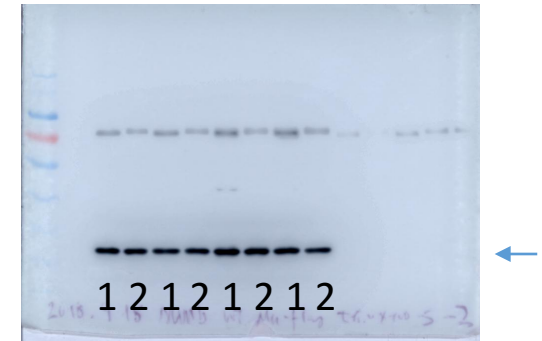

$\beta$ -ACTIN

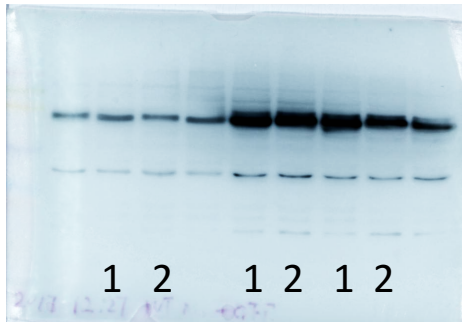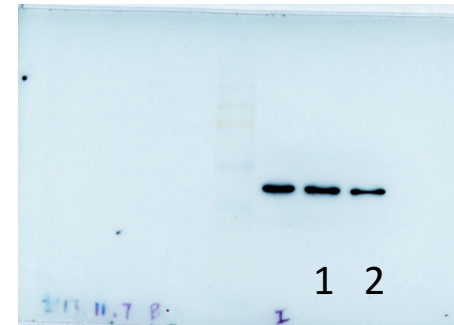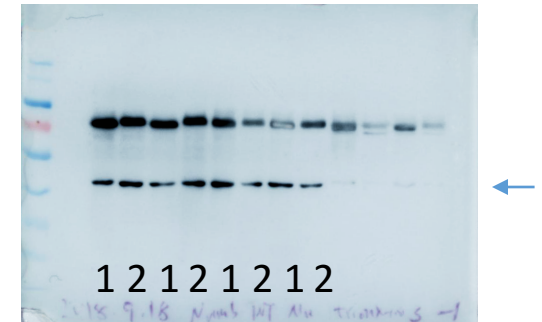

1: NUMB<sup>WT</sup> 2: NUMB<sup>R630H</sup>

Raw data for Figure 4 f

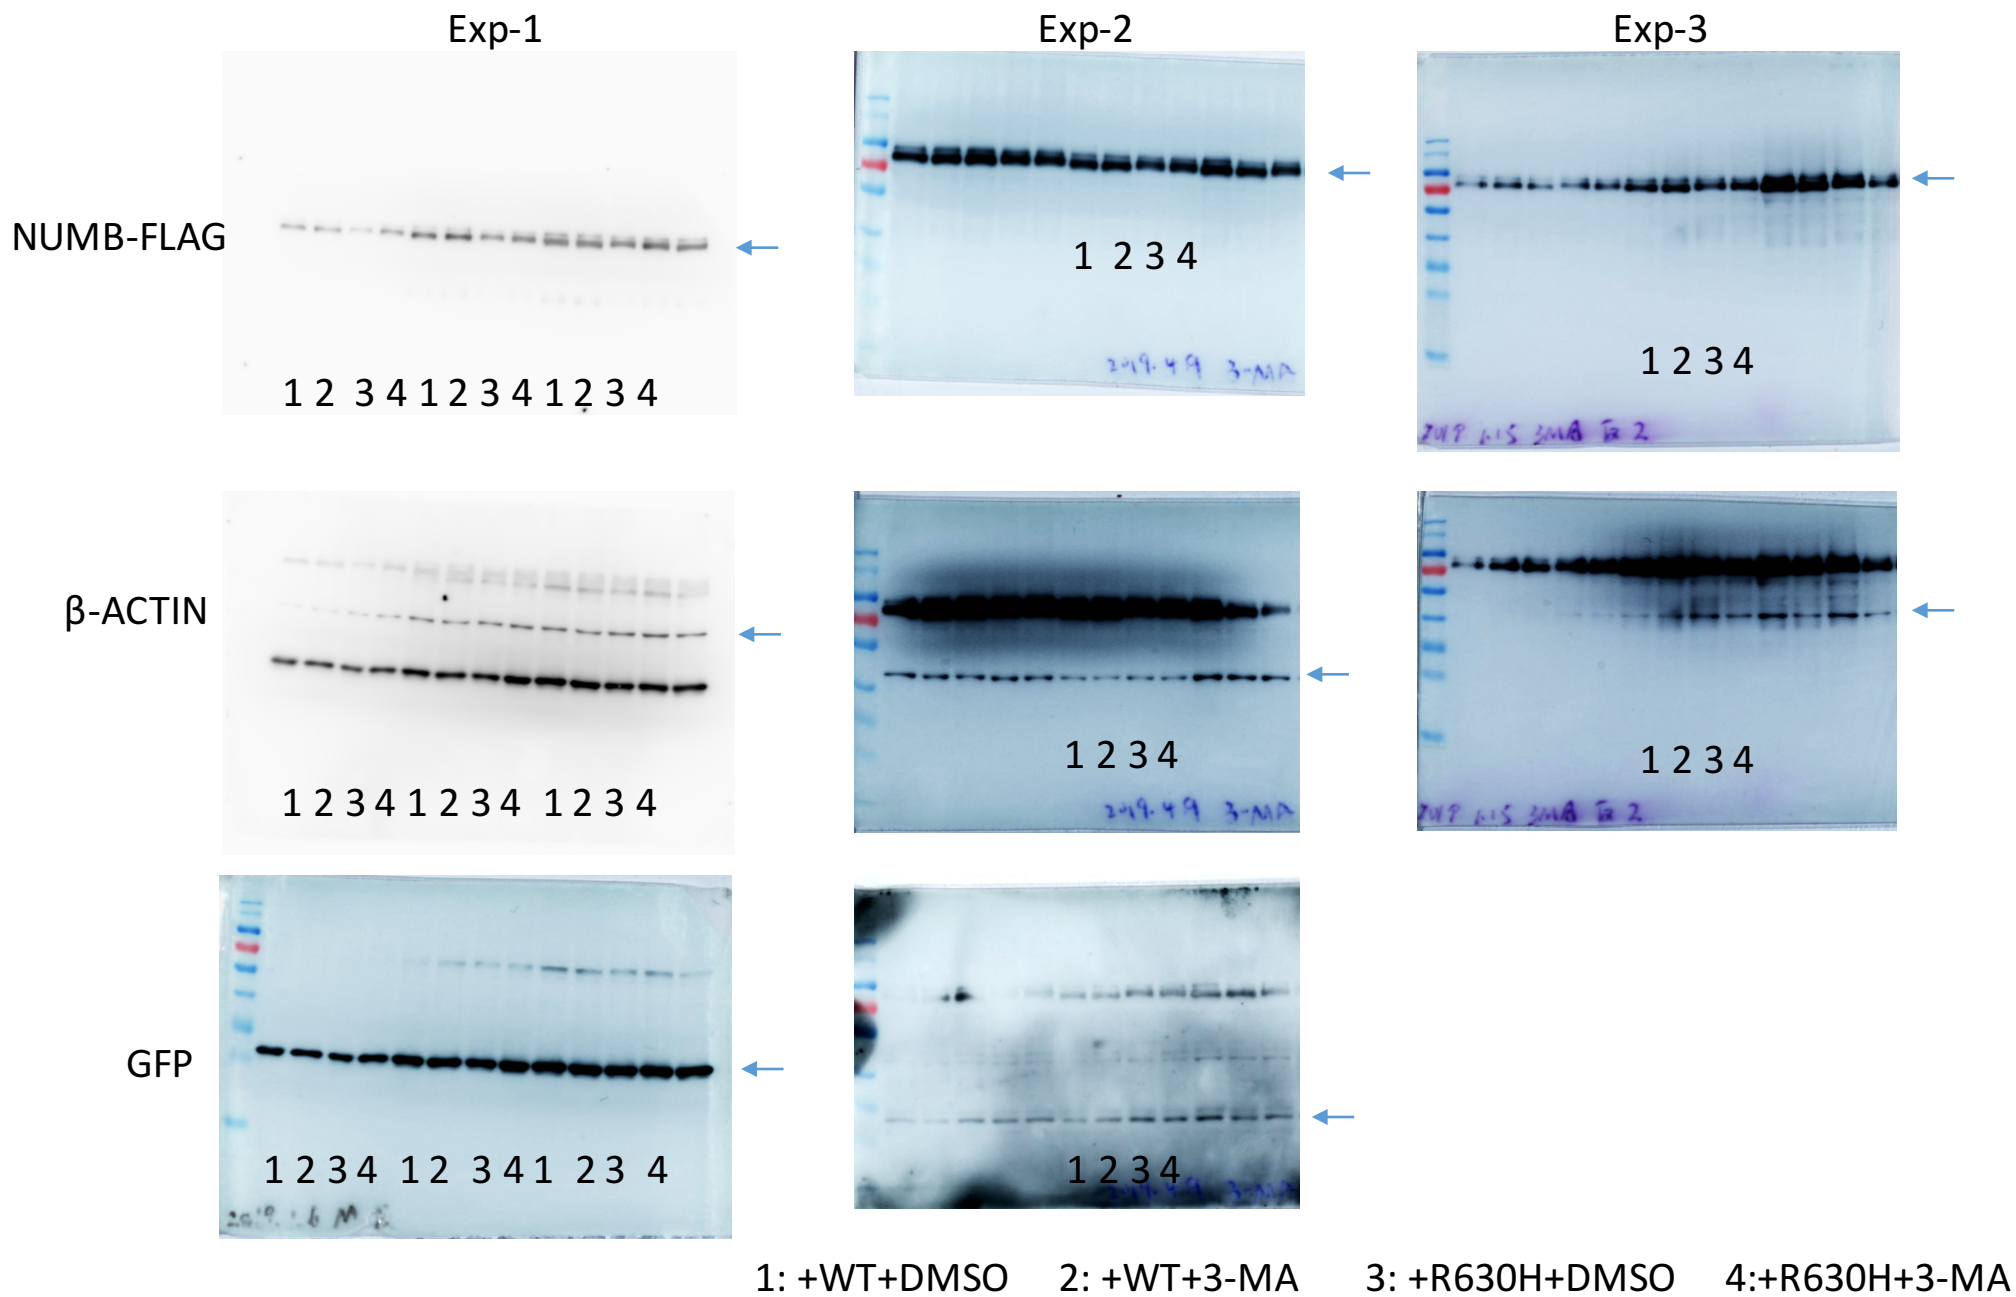

Raw data for Figure 4g

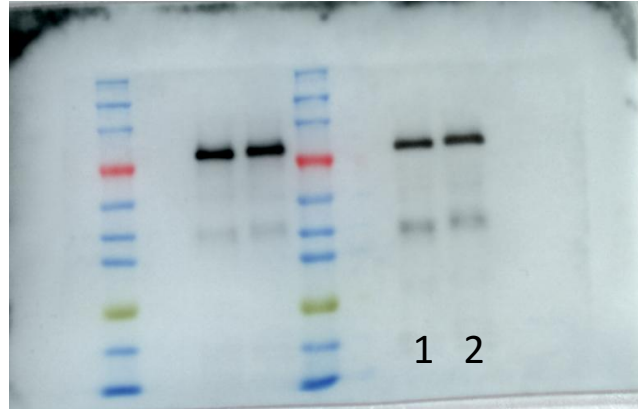

1: NUMB<sup>WT</sup> 2: NUMB<sup>R630H</sup>

Raw data for Figure 4 n

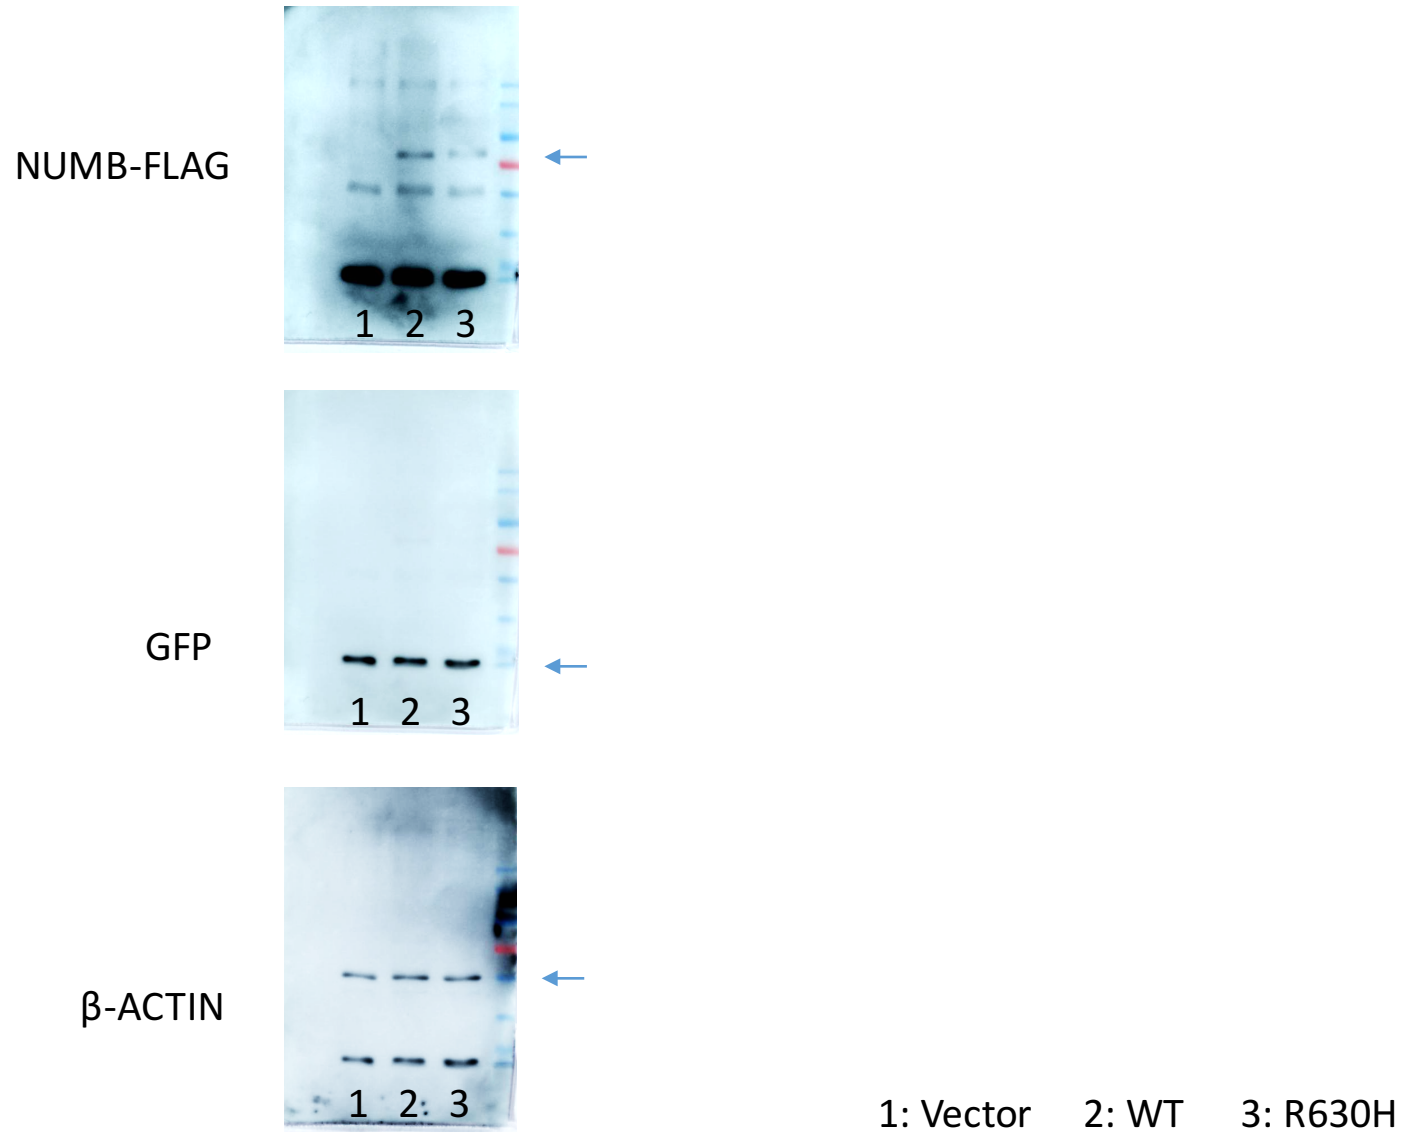

Raw data for Extended data Figure 3b

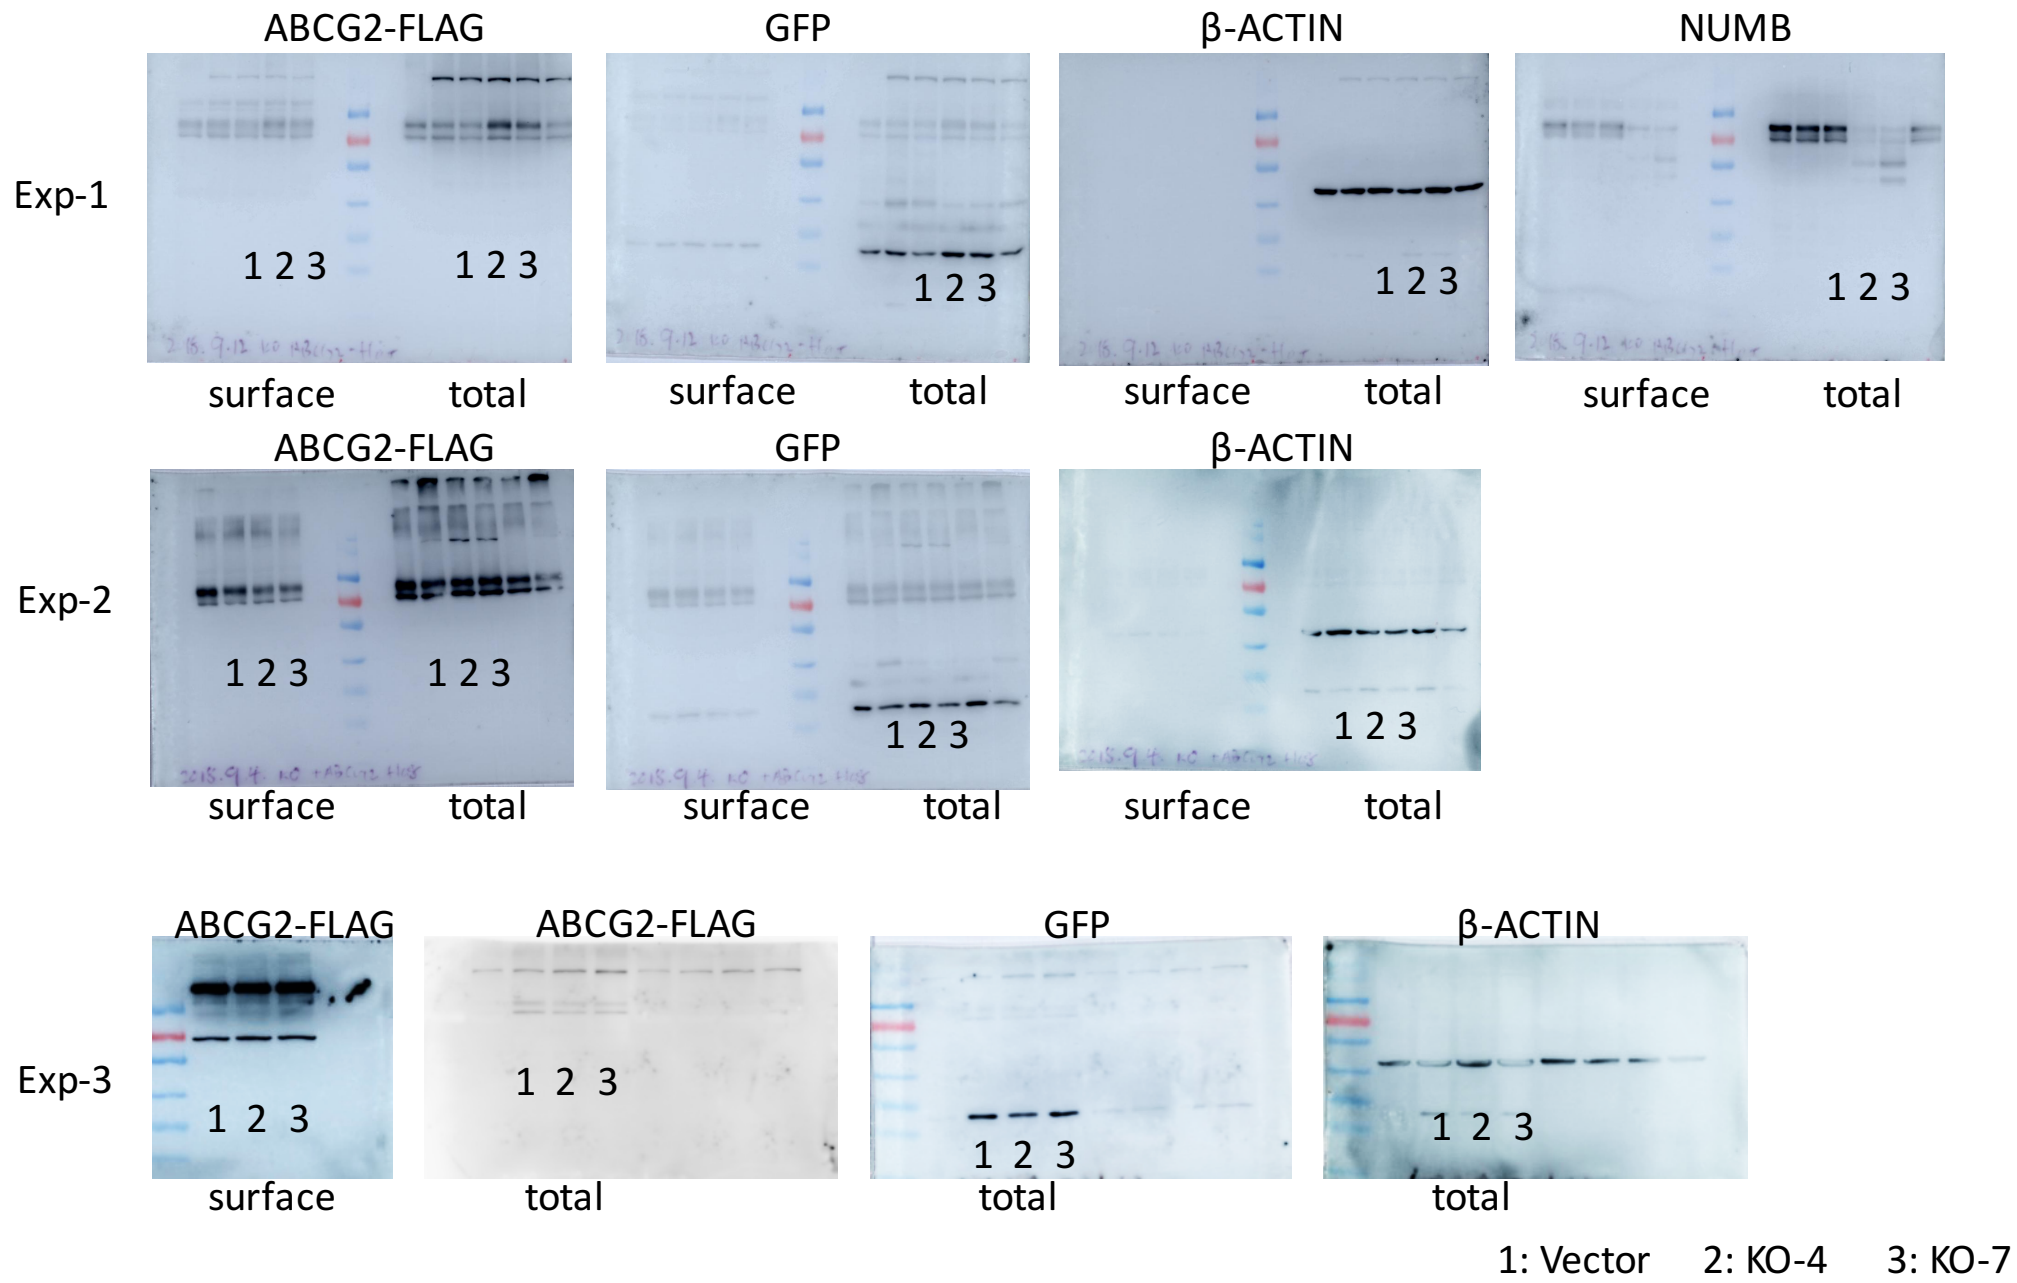

Supplement: 41421_2024_708_MOESM2_ESM.pdf [file 41421_2024_708_MOESM2_ESM.pdf]
