# Supplementary material for: NUMB dysfunction defines a novel mechanism underlying hyperuricemia and gout
Source: PubMed Central journal article supplement (PMC11494200; doi:10.1038/s41421-024-00708-6), 2024-10-22
Supplement: 41421_2024_708_MOESM1_ESM.pdf [file 41421_2024_708_MOESM1_ESM.pdf]

1  
2  
3

## Supplementary Information

Supplementary Table S1 Demographic information of the gout patients and a subset of healthy individuals

| Patient NO. | Gender | Age | Gout | HUA | Age of onset | Height (cm) | Weight (kg) | BMI (kg/m <sup>2</sup> ) | Urea nitrogen (mmol/L) | Creatinine (μmol/L) | Glucose (mmol/L) | Triglyceride (mmol/L) | Cholesterol (mmol/L) |
|-------------|--------|-----|------|-----|--------------|-------------|-------------|--------------------------|------------------------|---------------------|------------------|-----------------------|----------------------|
| II-5        | M      | 89  | Yes  | Yes | 60           | 166         | 85          | 30.8                     | 6.17                   | 106.00              | 5.02             | 1.56                  | 4.97                 |
| III-3       | F      | 72  | Yes  | Yes | 50           | 160         | 80          | 31.3                     | 5.04                   | 56.00               | 13.33            | 2.56                  | 6.23                 |
| III-17      | F      | 65  | Yes  | Yes | 53           | 158         | 70          | 28.0                     | 5.21                   | 47.00               | 5.43             | 1.71                  | 5.91                 |
| III-19      | M      | 63  | Yes  | Yes | 43           | 176         | 72          | 23.2                     | 5.07                   | 93.00               | 4.89             | 2.06                  | 4.65                 |
| III-21      | F      | 62  | Yes  | Yes | 58           | 160         | 66          | 25.8                     | 3.77                   | 58.00               | 5.64             | 1.90                  | 5.42                 |
| III-23      | F      | 59  | Yes  | Yes | 47           | 155         | 53          | 22.1                     | 6.26                   | 72.00               | 5.88             | 0.89                  | 6.51                 |
| III-25      | M      | 53  | Yes  | Yes | 40           | 184         | 85          | 24.2                     | 4.64                   | 87.00               | 6.34             | 1.41                  | 5.92                 |
| IV-2        | M      | 45  | Yes  | Yes | 38           | 175         | 78          | 25.5                     | 4.90                   | 68.00               | 10.67            | 3.60                  | 4.52                 |
| IV-34       | M      | 32  | Yes  | Yes | 31           | 180         | 85          | 26.2                     | 4.52                   | 74.00               | 4.82             | 1.87                  | 5.12                 |
| IV-30       | F      | 38  | No   | Yes | 30           | 163         | 58          | 21.8                     | 4.95                   | 50.00               | 4.60             | 0.58                  | 4.64                 |
| III-9       | M      | 66  | No   | No  |              | 160         | 88          | 29.0                     | 4.11                   | 72.00               | 5.49             | 1.41                  | 6.10                 |
| III-13      | F      | 62  | No   | No  |              | 150         | 63          | 27.8                     | 6.80                   | 93.40               | 4.20             | 2.41                  | 6.78                 |
| III-15      | F      | 59  | No   | No  |              | 150         | 45          | 20.0                     | 6.20                   | 86.40               | 4.00             | 2.56                  | 5.37                 |
| IV-4        | M      | 42  | No   | No  |              | 173         | 74          | 24.8                     | 4.94                   | 68.00               | 11.61            | 4.60                  | 4.52                 |
| IV-14       | M      | 43  | No   | No  |              | 162         | 60          | 22.9                     | 6.90                   | 96.20               | 3.80             | 0.95                  | 5.74                 |
| IV-18       | M      | 39  | No   | No  |              | 165         | 70          | 25.7                     | 6.80                   | 87.10               | 3.70             | 1.14                  | 3.61                 |
| IV-27       | M      | 42  | No   | No  |              | 165         | 85          | 31.2                     | 7.30                   | 98.30               | 3.80             | 2.21                  | 5.07                 |
| IV-32       | F      | 34  | No   | No  |              | 166         | 65          | 23.5                     | 5.82                   | 66.00               | 11.05            | 2.12                  | 5.29                 |

4

1  
2  
3  
4

**Supplementary Table S2      Clinical characteristics of gout patients**

| Patient NO. | Urinary calculi (w/wo) | Tophi (w/wo) | Highest serum urate (μmol/L) | Urate at onset (μmol/L) | Annu onset frequency | Joints affected | Hypertension (w/wo) | Diabetes (w/wo) | Hyperlipidemia (w/wo) | Coronary heart disease (w/wo) |
|-------------|------------------------|--------------|------------------------------|-------------------------|----------------------|-----------------|---------------------|-----------------|-----------------------|-------------------------------|
| II -5       | w                      | w            | 502                          | 464                     | 10-12                | 4               | w                   | wo              | wo                    | w                             |
| III-3       | wo                     | wo           | 518                          | 403                     | 2-3                  | 2               | wo                  | w               | w                     | w                             |
| III-17      | wo                     | wo           | 487                          | 360                     | 2-3                  | 2               | w                   | wo              | wo                    | wo                            |
| III-19      | wo                     | w            | 591                          | 457                     | 5-6                  | 3               | w                   | w               | wo                    | wo                            |
| III-21      | wo                     | wo           | 468                          | 392                     | 2-3                  | 1               | w                   | wo              | wo                    | wo                            |
| III-23      | wo                     | wo           | 509                          | 302                     | 1-2                  | 1               | wo                  | wo              | wo                    | wo                            |
| III-25      | w                      | wo           | 519                          | 355                     | 3-4                  | 2               | wo                  | wo              | wo                    | wo                            |
| IV-2        | wo                     | wo           | 462                          | 462                     | 1-2                  | 1               | wo                  | wo              | w                     | wo                            |
| IV-34       | wo                     | wo           | 453                          | 453                     | 2                    | 1               | wo                  | wo              | wo                    | wo                            |

5

1 **Supplementary Table S3**      **Proteins interact with NUMB<sup>WT</sup> AND NUMB<sup>R630H</sup>**

2

| Proteins interact with both NUMB <sup>WT</sup> and NUMB <sup>R630H</sup> |          |         |        |        |         | Proteins interact with NUMB <sup>WT</sup> | Proteins interact with NUMB <sup>R630H</sup> |
|--------------------------------------------------------------------------|----------|---------|--------|--------|---------|-------------------------------------------|----------------------------------------------|
| ACOT9                                                                    | EPS15    | MRPS22  | RPL13  | RPS12  | SLC25A3 | AKAP8                                     | AHSG                                         |
| ANAPC7                                                                   | EPS15L1  | MRPS23  | RPL13A | RPS13  | SMAP    | BYSL                                      | ANKRD28                                      |
| AP1B1                                                                    | FAM120A  | MRPS24  | RPL14  | RPS14  | SNRNP70 | CAD                                       | ANXA2                                        |
| AP2A1                                                                    | FAU      | MRPS25  | RPL15  | RPS15  | SNRPB   | CALM3                                     | ATP8B1                                       |
| AP2A2                                                                    | GEMIN4   | MRPS26  | RPL17  | RPS15A | SNRPD2  | CCT5                                      | CCT3                                         |
| AP2B1                                                                    | GNL3     | MRPS27  | RPL18  | RPS16  | SNRPD3  | CSNK2B                                    | CCT8                                         |
| AP2M1                                                                    | GPRC5A   | MRPS28  | RPL18A | RPS17  | SNRPE   | DDX41                                     | CDC16                                        |
| AP2S1                                                                    | H1-3     | MRPS31  | RPL19  | RPS18  | SNRPG   | EIF3H                                     | CDC27                                        |
| ATAD3B                                                                   | H2BC18   | MRPS33  | RPL22  | RPS19  | SNX9    | IGLV1-51                                  | DCAF7                                        |
| ATP5MF                                                                   | H3-7     | MRPS34  | RPL23  | RPS2   | SRSF1   | KPNA2                                     | DDB1                                         |
| AURKAIP1                                                                 | HACD3    | MRPS35  | RPL23A | RPS20  | SRSF3   | KRT6B                                     | EEF1A1                                       |
| BAG2                                                                     | HADHA    | MRPS5   | RPL24  | RPS21  | SRSF6   | MRPL49                                    | ELP1                                         |
| BANF1                                                                    | HNRNPA0  | MRPS6   | RPL26  | RPS23  | SRSF9   | MRPS18C                                   | EPPK1                                        |
| CCT2                                                                     | HNRNPL   | MRPS7   | RPL27  | RPS24  | SSB     | PDCD4                                     | GAPDH                                        |
| CCT4                                                                     | HNRNPM   | MRPS9   | RPL27A | RPS25  | SSBP1   | PGAM5                                     | GIMAP4                                       |
| CDC23                                                                    | HNRNPU   | NAP1L1  | RPL28  | RPS26  | SUPT16H | PKD2                                      | GTF3C1                                       |
| CFL1                                                                     | HNRNPUL2 | NCL     | RPL3   | RPS27L | SURF6   | PNO1                                      | HADHB                                        |
| CHCHD1                                                                   | ILF2     | NPM1    | RPL30  | RPS28  | TCOF1   | PRMT5                                     | HSD17B12                                     |
| CLTC                                                                     | IPO7     | NUMB    | RPL31  | RPS29  | TRA2B   | RPL21                                     | HSPB1                                        |
| CSNK2A1                                                                  | KANK2    | NUMBL   | RPL32  | RPS3   | TSR1    | RPL29                                     | HSPD1                                        |
| DAP3                                                                     | KHDRBS1  | PARP1   | RPL34  | RPS3A  | TUFM    | SKP1                                      | LUC7L2                                       |
| DDX17                                                                    | KPNA1    | PPP2R1A | RPL35  | RPS4X  | U2AF1   | SMARCA5                                   | MT-CO2                                       |
| DDX5                                                                     | KRT8     | PPP2R2A | RPL35A | RPS5   | U2AF2   | SPAG9                                     | NCOR1                                        |
| DHX15                                                                    | LTV1     | PPP6R3  | RPL36  | RPS6   | UBR5    | SQSTM1                                    | PHKA2                                        |

|        |           |        |         |          |         |         |         |
|--------|-----------|--------|---------|----------|---------|---------|---------|
| DYNLL1 | MACROH2A1 | PRDX4  | RPL36AL | RPS7     | USP9X   | SRP72   | PHKG2   |
| EEF2   | MATR3     | PRKDC  | RPL4    | RPS8     | WDR26   | SRSF7   | PPP6C   |
| EIF3A  | MOV10     | PTCD3  | RPL5    | RPS9     | XRN2    | SUGP2   | SEC61A1 |
| EIF3B  | MRPS10    | PYCR3  | RPL6    | RPSA     | YBX1    | SYNCRIP | SLC25A1 |
| EIF3CL | MRPS11    | RACK1  | RPL7    | RSF1     | YWHAB   | TBC1D32 | TOMM22  |
| EIF3D  | MRPS12    | RALY   | RPL7A   | RUVBL1   | YWHAE   | TBL1XR1 | TRIM28  |
| EIF3E  | MRPS14    | RBM39  | RPL8    | RUVBL2   | YWHAQ   | UACA    | TUBAL3  |
| EIF3F  | MRPS15    | RBMX   | RPLP0   | SAFB     | ZC3H4   | USP7    | YWHAG   |
| EIF3G  | MRPS16    | RCN2   | RPLP1   | SERBP1   | ZC3HAV1 | WDR82   | ZNF572  |
| EIF3I  | MRPS17    | RNGTT  | RPLP2   | SET      | ZFR     | YBX3    |         |
| EIF3L  | MRPS18B   | RPL10A | RPS10   | SLC25A10 | ZNF326  | YPEL5   |         |
| EIF3M  | MRPS2     | RPL11  | RPS11   | SLC25A11 | ZNRD2   | YTHDC2  |         |
| EIF4A1 | MRPS21    | RPL12  |         |          |         |         |         |

**Supplementary Table S4. Genotyping Primers**

| Type                     |         | Sequence (5'-3')         | Annealing temperature (°C) |
|--------------------------|---------|--------------------------|----------------------------|
| 5'arm-sdneo cassette PCR | Forward | GCCTGTA ACTCGAGGGACCTA   | 62                         |
|                          | Reverse | CCCTAGCAGAGAGACTGGCTATAA |                            |
| 5'arm-sdneo cassette PCR | Forward | AGCCTTGTTTTGTAGCCTGTAAC  | 62                         |
|                          | Reverse | GACTCTGCTTTAGTGGGATGAGA  |                            |
| sequencing PCR           | Forward | CAATGGTTCTGCAGCTTTCAATG  | 62                         |
|                          | Reverse | GATCTGGAAAGCAAACAAAGTCCC |                            |

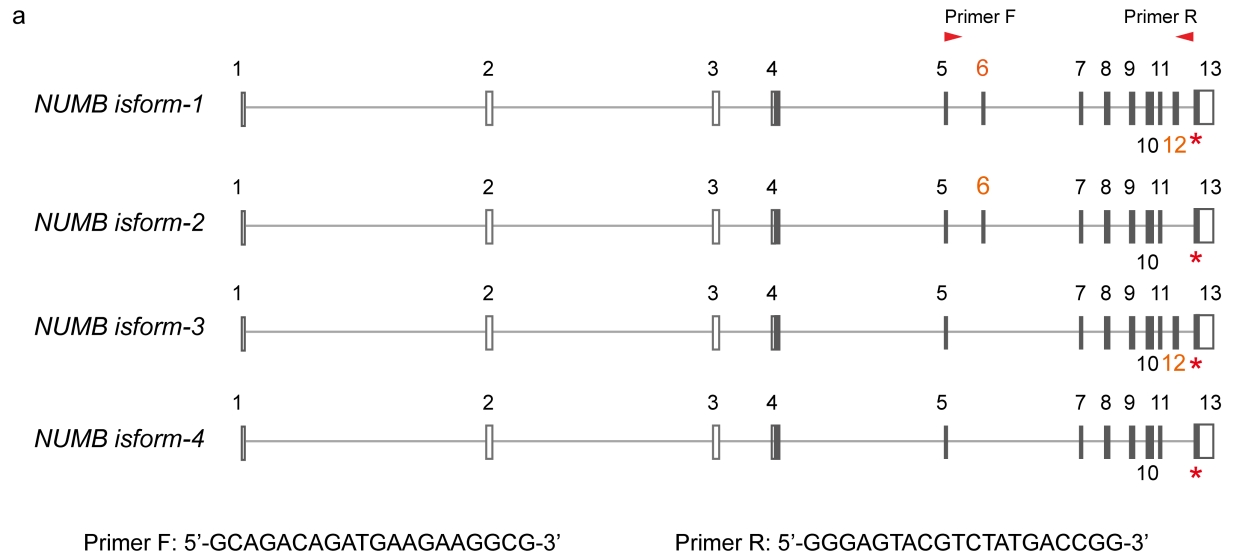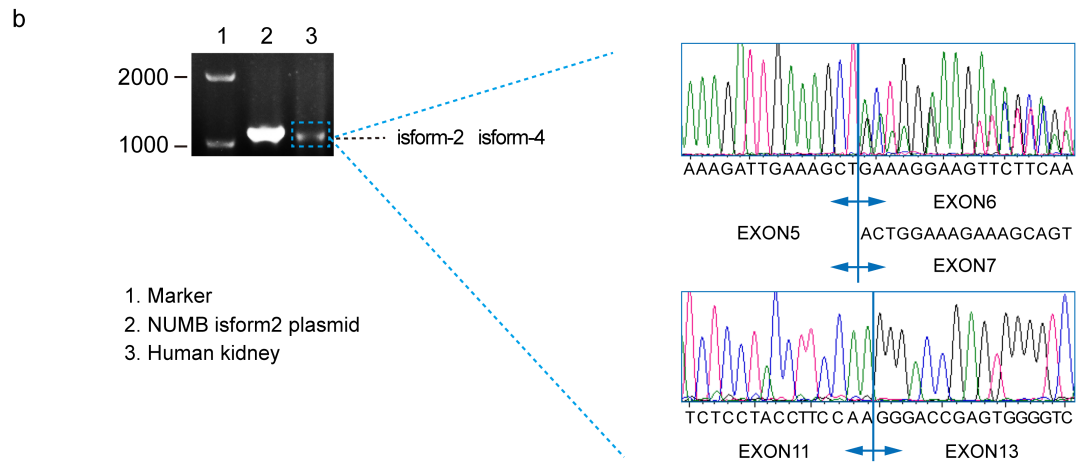

**Supplementary Fig. S1 NUMB isoforms in human kidney.** **a**, The diagram of NUMB isoforms and the primers used to amplify the gDNA region covering the known splicing site. The red triangles indicate the location of the primers. \*, NUMB variant (rs375597310). **b**, The agarose gel electrophoresis of the PCR product using NUMB isform-2 plasmid as template (2) and RT-PCR products of human kidney tissue (3). The band marked with dashed line rectangle was cut and sequenced. The results are shown in the right panel.

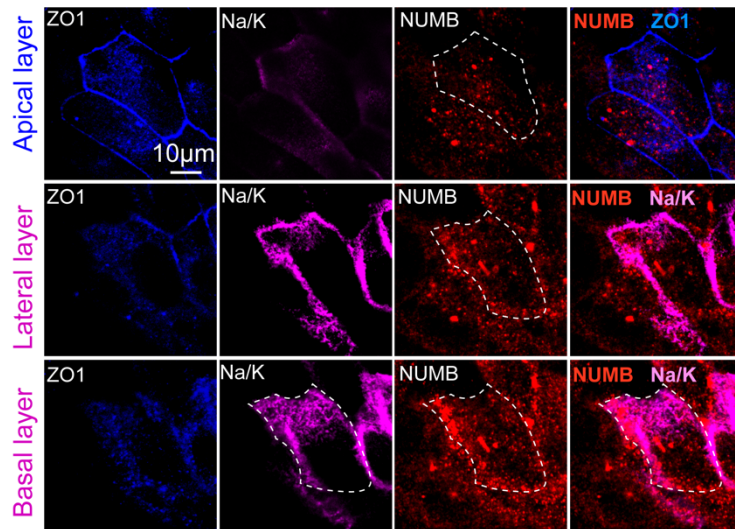

**Supplementary Fig. S2 The distribution of NUMB in polarized MDCK cells.**

Immunofluorescence staining of NUMB in polarized MDCK cells. ZO-1 (blue), Na/K ATPase (magenta) were stained. NUMB (red) was immuno-stained with mouse anti-NUMB antibody (Santa Cruz).

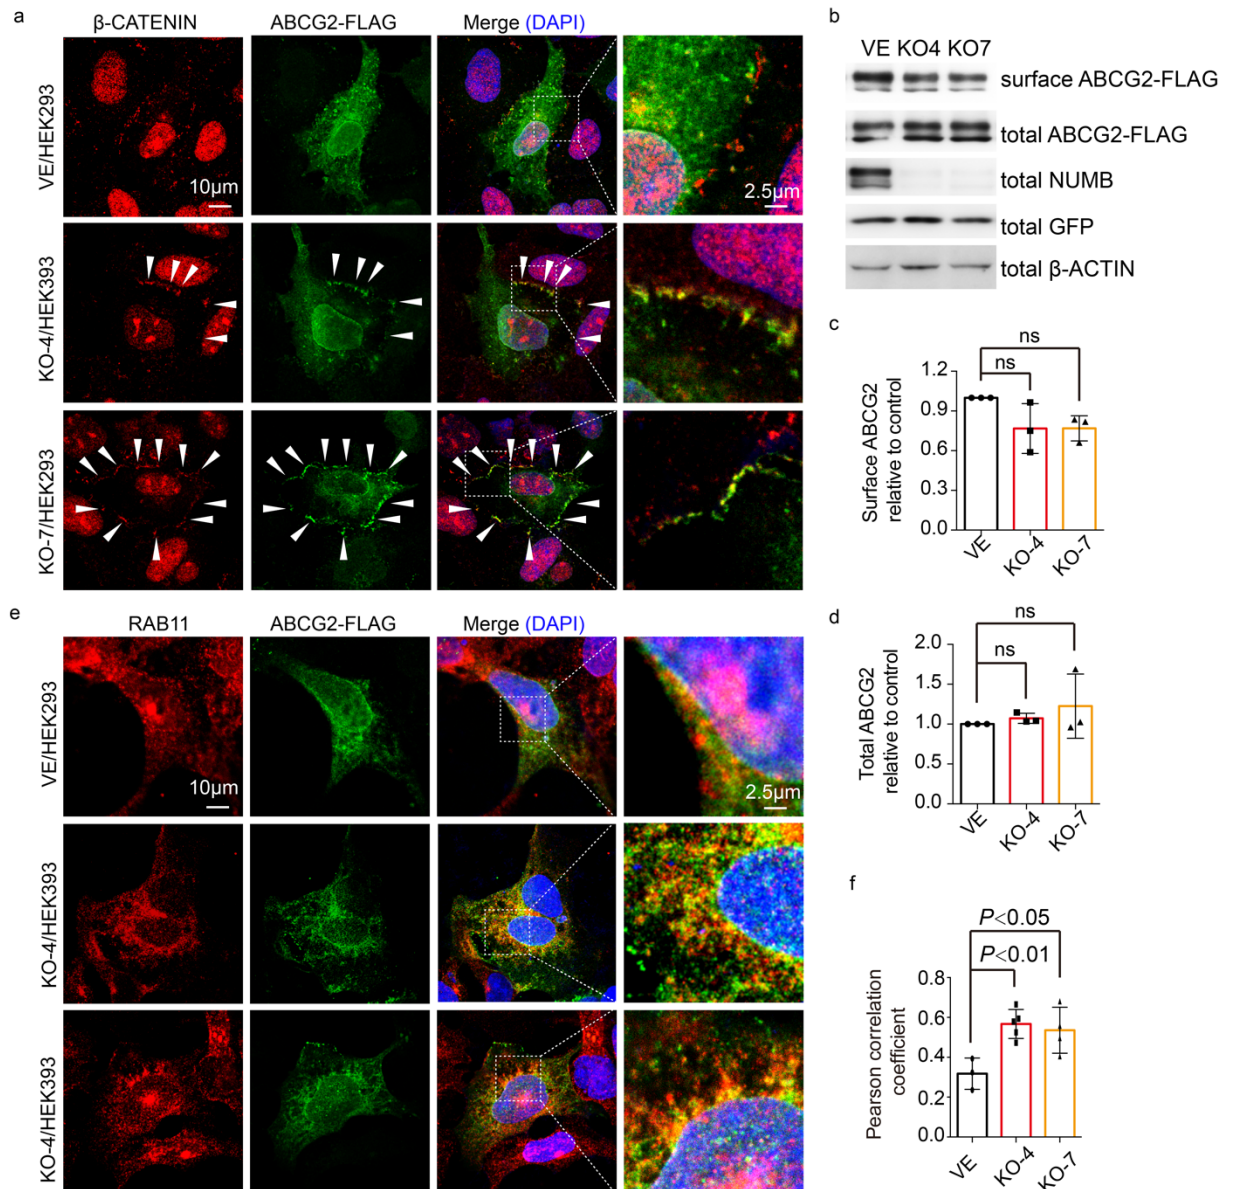

**Supplementary Fig. S3 Distribution of ABCG2 in *NUMB* knockout HEK293**

**cells.** **a**, Distribution of ABCG2 in *NUMB* knockout or control HEK293 cells.

ABCG2-FLAG plasmid was transfected into *NUMB* knockout (KO) or control (VE)

HEK293 cells, followed by immunofluorescence staining with FLAG tag antibody and

$\beta$ -CATENIN antibody. The white arrow heads indicate the accumulation of ABCG2

protein at the cell-cell contact region close to the adhesive junction. KO-4, KO-7

indicate knockout cells generated by sgRNA targeting exon 4 and exon 7, respectively.

**b-d**, Detection of surface ABCG2 protein and ABCG2 in whole cell lysate (total



ABCG2) in *NUMB* knockout or control HEK293 cells. The statistic result is shown in **c-d** (n=3 per group). **e-f**, The co-localization of ABCG2 with RAB11 in *NUMB* knockout or control HEK293 cells. The statistic result is shown in **f** (VE n=3; KO-4 n=5; KO-7 n=4). Statistics was calculated with One-way ANOVA with Tukey's Multiple Comparison Test. The results are presented as mean  $\pm$  SD.

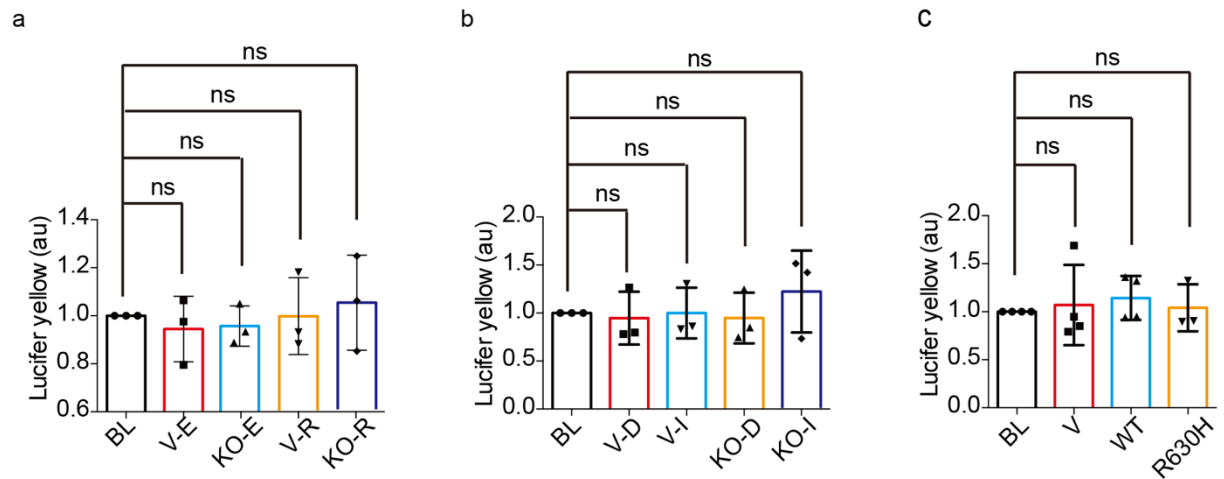

**Supplementary Fig. S4 Determination of the integrity of MDCK monolayers in**

**trans-cellular uric acid transport assay.** **a**, Statistic result of the fluorescence of

Lucifer yellow in the receiver side of control cells (V-E) and NUMB KO cells (KO-E)

in the excretion assay, and of control cells (V-R) and NUMB KO cells (KO-R) in the

reabsorption assay. BL: blank control. (n=3 per group). **b**, Statistic analysis on the

fluorescence of Lucifer yellow in the receiver side of control cells treated with ABCG2

inhibitor (V-I) or with the solvent DMSO (V-D), and *NUMB* KO cells treated with

ABCG2 inhibitor (KO-I) or with the solvent DMSO (KO-D) in the excretion assay (n=3

per group). **c**, Statistic comparison of the fluorescence of Lucifer yellow between in the

receiver side of blank control (n=4) and of control cells (V, n=4), the *NUMB*<sup>WT</sup> stably

expressing MDCK cells (WT, n=4) or the *NUMB*<sup>R630H</sup> stably expressing MDCK cells

(KO, n=3) in the excretion assay. Statistics was calculated with One-way ANOVA with

Tukey's Multiple Comparison Test. The results are presented as mean ± SD.

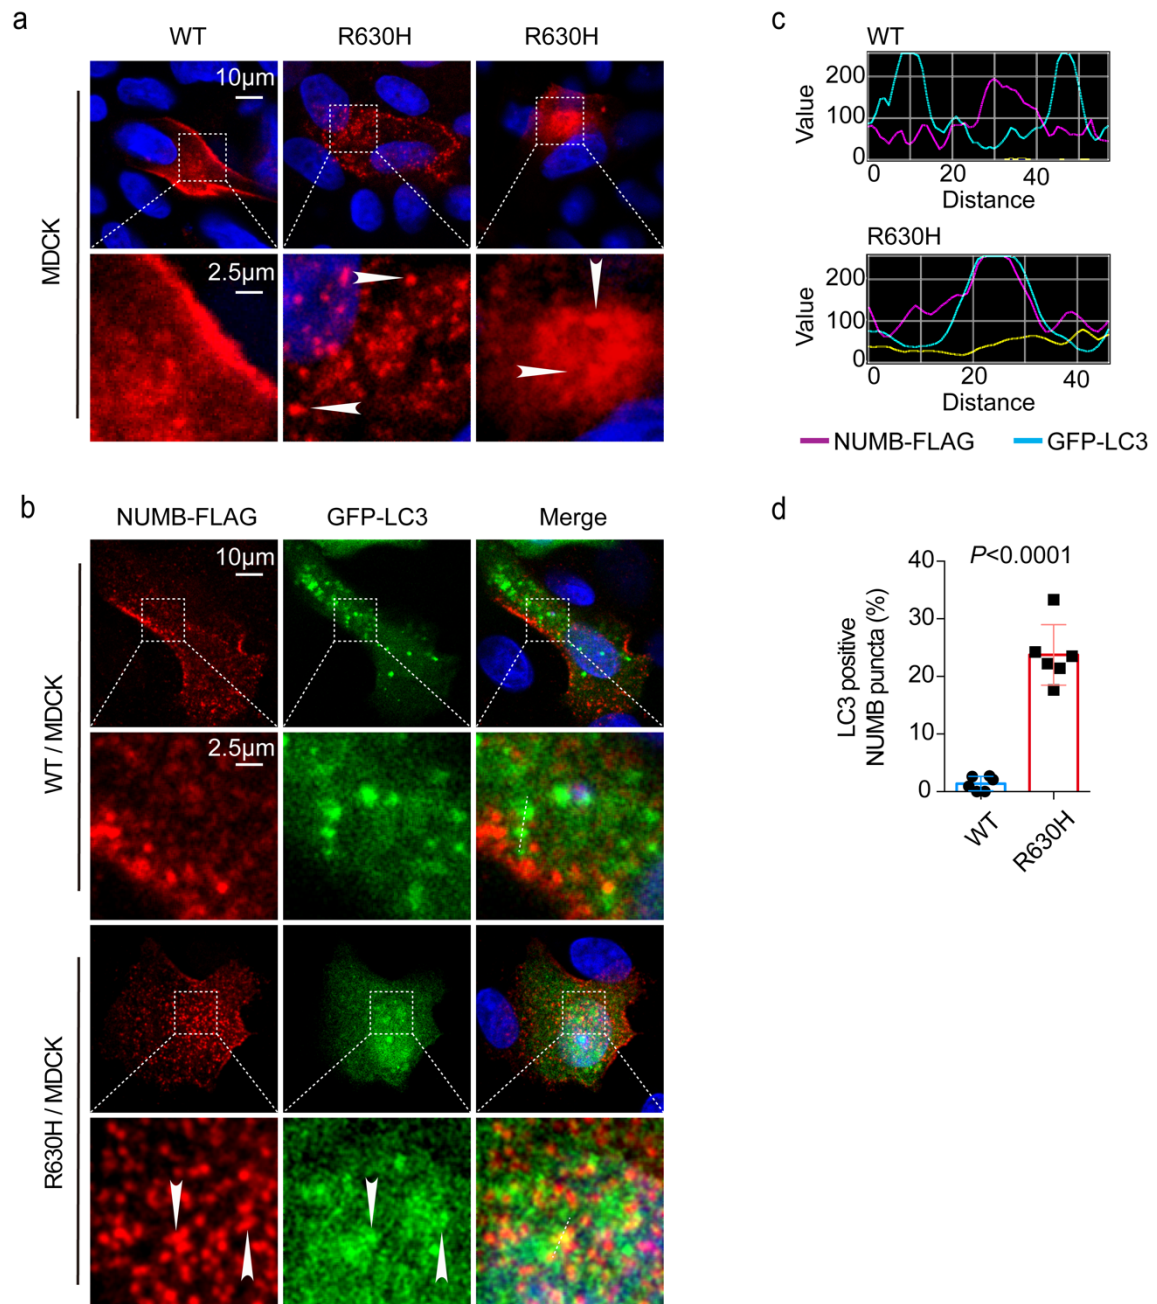

**Supplementary Fig. S5 Abnormal distribution of NUMB<sup>R630H</sup> mutant protein**

**and its co-localization with LC3 in MDCK cells. a,** The distribution of NUMB<sup>WT</sup>

and NUMB<sup>R630H</sup> protein in MDCK cells. MDCK cells were transfected with NUMB<sup>WT</sup>-3FLAG or NUMB<sup>R630H</sup>-3FLAG plasmid, followed by immuno-fluorescence staining

with FLAG tag antibody. The white arrow heads indicate the granule-like structure

found in cells expressing NUMB<sup>R630H</sup>. **b-d,** Immuno-fluorescence staining of

NUMB<sup>WT</sup> and NUMB<sup>R630H</sup> and LC3. NUMB<sup>WT</sup>-3FLAG or NUMB<sup>R630H</sup>-3FLAG plasmid was co-transfected with GFP-LC3 plasmid into MDCK cells, followed by immuno-fluorescence staining with FLAG tag antibody and GFP antibody. The white arrow heads indicate the granule-like structures of NUMB<sup>R630H</sup> co-stained with LC3. Fluorescent signal intensity along the dashed lines are shown in **c. d**, Comparison of the percentage of NUMB punctate or granule structure co-localized with LC3 between in cells expressing NUMB<sup>WT</sup> and in cells expressing NUMB<sup>R630H</sup> (n=6 per group). Statistics was calculated using two-tailed unpaired Student's *t* test. The results are presented as mean  $\pm$  SD.

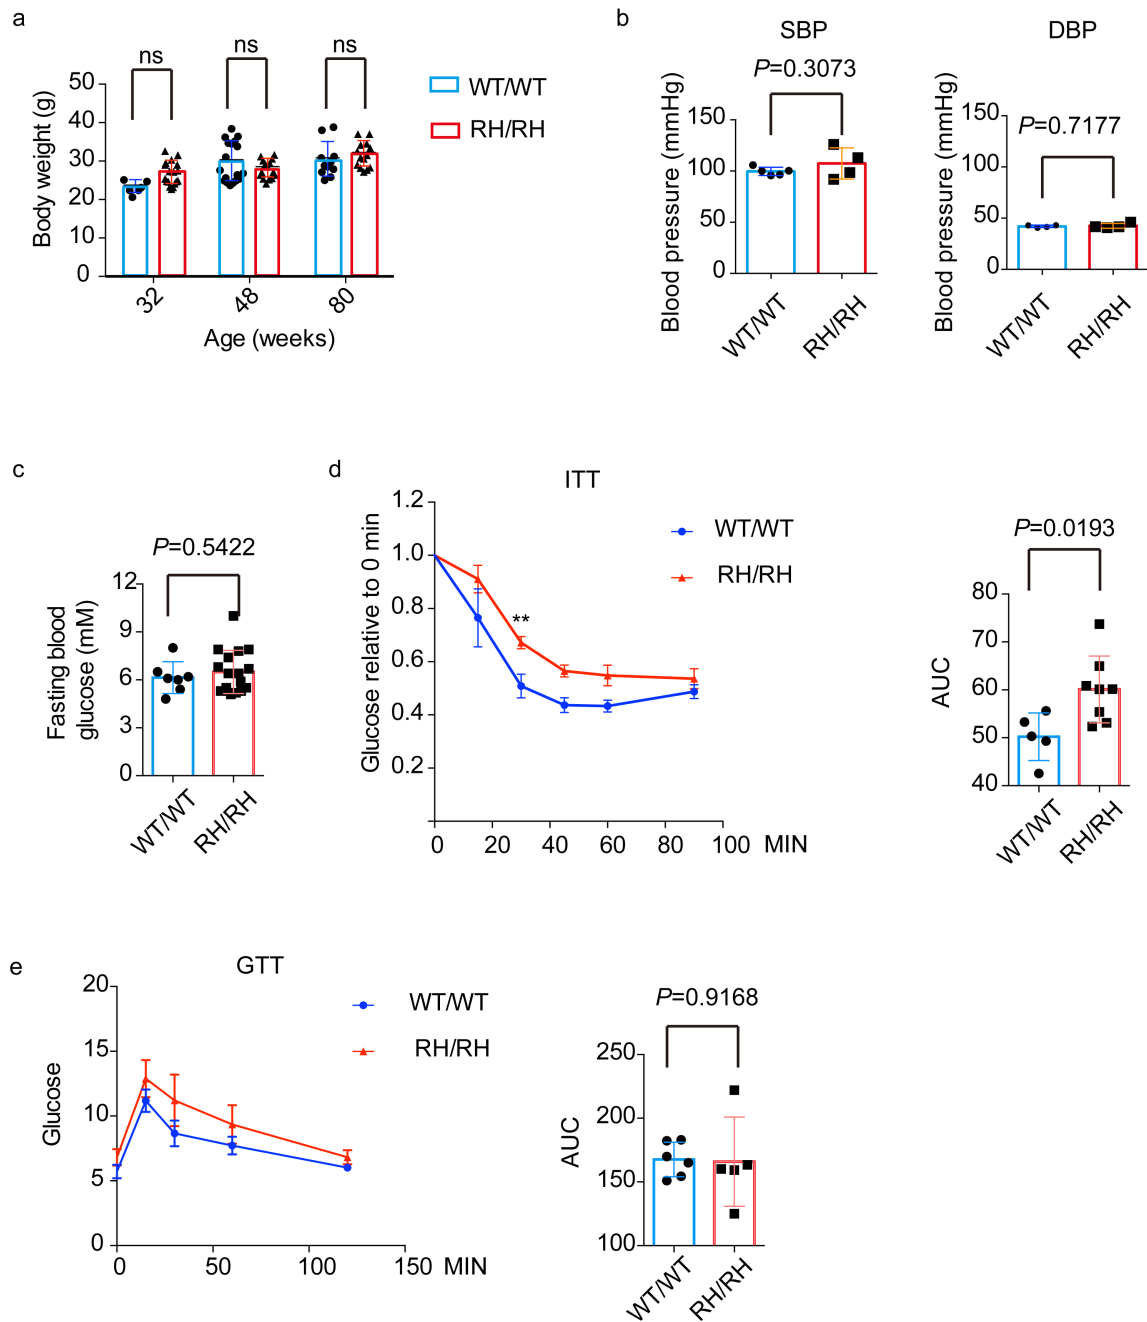

**Supplementary Fig. S6 Knockin of the Numb<sup>R630H</sup> mutant gene in mice does not**

**affect general physiology of mice. a**, Comparison of body weight of WT/WT mice

and Numb<sup>R632H</sup>/Numb<sup>R632H</sup> mice at the age of 32 (WT/WT n=6, RH/RH n=18), 48

(WT/WT n=18, RH/RH n=15) and 80 weeks (WT/WT n=11, RH/RH n=14). **b**, The

blood pressure of 80-weeks WT/WT mice and Numb<sup>R632H</sup>/Numb<sup>R632H</sup> mice. SBP

(WT/WT n=5, RH/RH n=14;  $t=1.101$ ,  $df=7$ ) and DBP (n=4 per group,  $t=0.3790$ ,  $df$

= 6) represent systolic and diastolic blood pressure, respectively. **c**, The fasting blood glucose of 80-weeks WT/WT mice (n=7) and NUMB<sup>R632H</sup>/NUMB<sup>R632H</sup> mice (n=17;  $t = 0.6192$ ,  $df = 22$ ). **d-e**, The insulin tolerance test (ITT) and glucose tolerance test (GTT) of 80-weeks WT/WT mice and NUMB<sup>R632H</sup>/NUMB<sup>R632H</sup> mice. The statistic results of area under curve of ITT (WT/WT n=5, RH/RH n=8;  $t = 0.2738$ ,  $df = 11$ ) and GTT (WT/WT n=6, RH/RH n=5;  $t = 0.1074$ ,  $df = 9$ ) are shown in the right panel. Statistics was calculated using two-tailed unpaired Student's  $t$  test (**b-e**) or Two-way ANOVA with Sidak's Multiple Comparison Test (**a**). The results are presented as mean  $\pm$  SD.

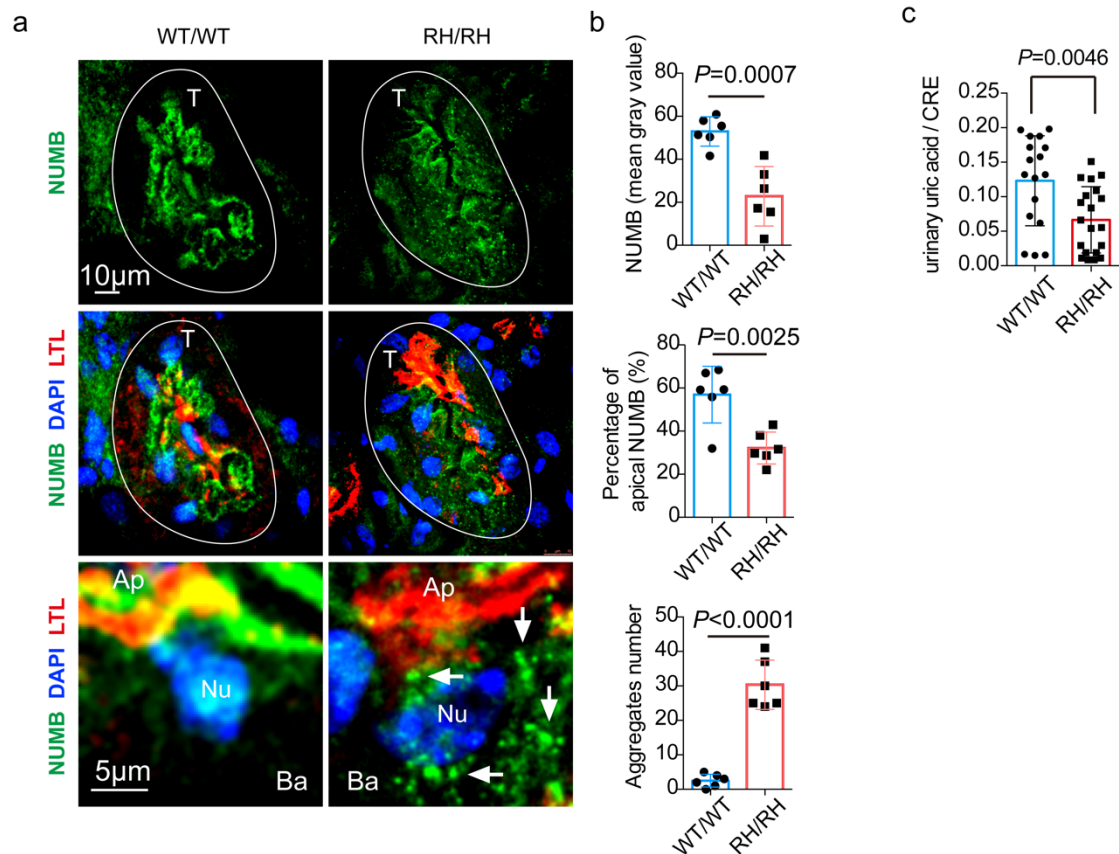

**Supplementary Fig. S7 The abnormal distribution of NUMB<sup>R632H</sup> in renal tubular epithelia cells and the defction in uric acid excretion of female NUMB<sup>R632H</sup> /NUMB<sup>R632H</sup> homozygous mice.** **a**, Representative images of immunofluorescence staining of NUMB in kidney tissue of female WT/WT mice and NUMB<sup>R632H</sup> /NUMB<sup>R632H</sup> mice. The solid lines indicate the edge of renal tubules. T: renal tubules; Ap: apical side of RTECs; Ba: basolateral side of RTECs. White arrows indicate sporadic distribution of granule-like structure of NUMB<sup>R632H</sup> protein in cytoplasm of RTECs. **b**, Statistic comparison of NUMB protein (top pannel), apical NUMB (middle panel) and NUMB aggregate-like structure (bottom panel) each renal tubule between in female WT/WT mice (n=6) and in female NUMB<sup>R632H</sup> /NUMB<sup>R632H</sup> mice (n=6). **c**, Comparison of the ratio of urinary uric acid to urinary creatinine between in female WT/WT mice and in female NUMB<sup>R632H</sup> /NUMB<sup>R632H</sup> (RH/RH) mice

(WT/WT n=17; RH/RH n=20). Statistics was calculated using two-tailed unpaired Student's *t* test. The results are presented as mean  $\pm$  SD.



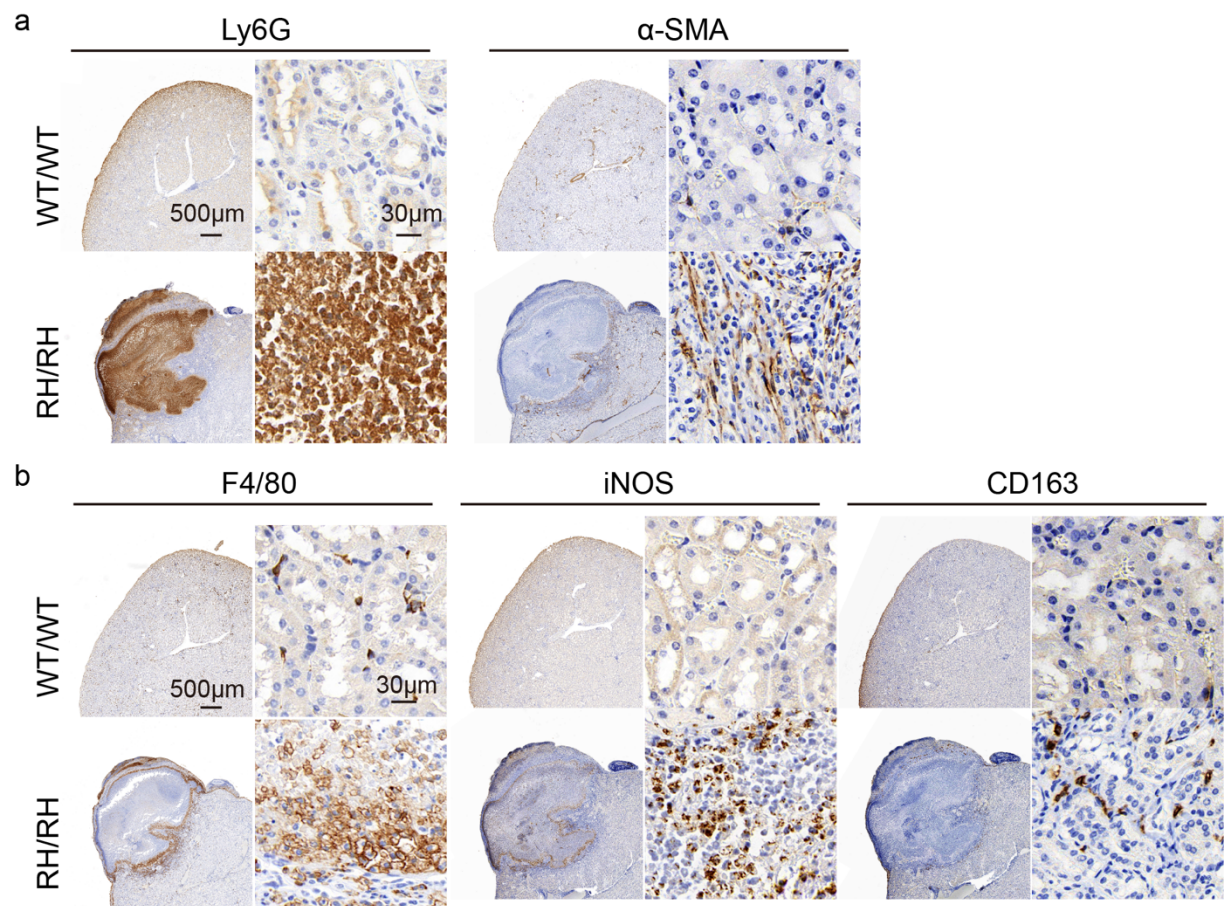

**Supplementary Fig. S8 Immunohistochemical staining of renal tissue with severe inflammation in  $NUMB^{R632H}/NUMB^{R632H}$  mice. a,** Immunohistochemical staining of neutrophils marker Ly6G and myofibroblast marker  $\alpha$ -SMA. **b,** Immunohistochemical staining of pan macrophages marker F4/80, M1 type macrophages marker iNOS and M2 type macrophages marker CD163.

**Supplementary Video S1**    **3D projection showing the distribution of ABCG2 in control polarized MDCK cells.**

**Supplementary Video S2**    **3D projection showing the distribution of ABCG2 in *NUMB*-knockout polarized MDCK cells.**
